# Supplementary material for: Apparent Yield Stress of Sputum as a Relevant Biomarker in Cystic Fibrosis
Source: MDPI journal article supplement (doi:10.3390/cells10113107), 2021-11-10
Supplement: s1 [file s1]

# Apparent yield stress of sputum as a relevant biomarker in Cystic Fibrosis

Rosy Ghanem<sup>1</sup>, Philippe Roquefort<sup>2</sup>, Sophie Ramel<sup>3</sup>, Véronique Laurent<sup>1</sup>, Tanguy Haute<sup>1</sup>, Tony Le Gall<sup>1</sup>, Thierry Aubry<sup>2\*</sup>, Tristan Montier<sup>1,4\*</sup>

## Table of contents

Supplementary Figures.....**Error! Bookmark not defined.**[2](#)

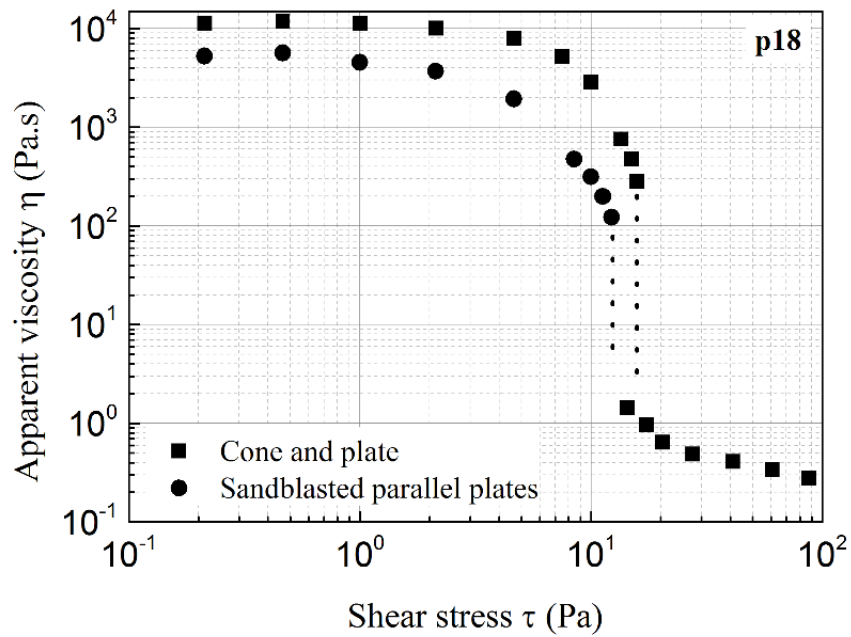

**Figure S1:** Investigation of possible slip effects: flow curve of p18 sputum using two different geometries; cone-plate (diameter: 50 mm, cone angle:  $1^\circ$ ) and sandblasted parallel plates (diameter: 25 mm, gap: 1 mm).

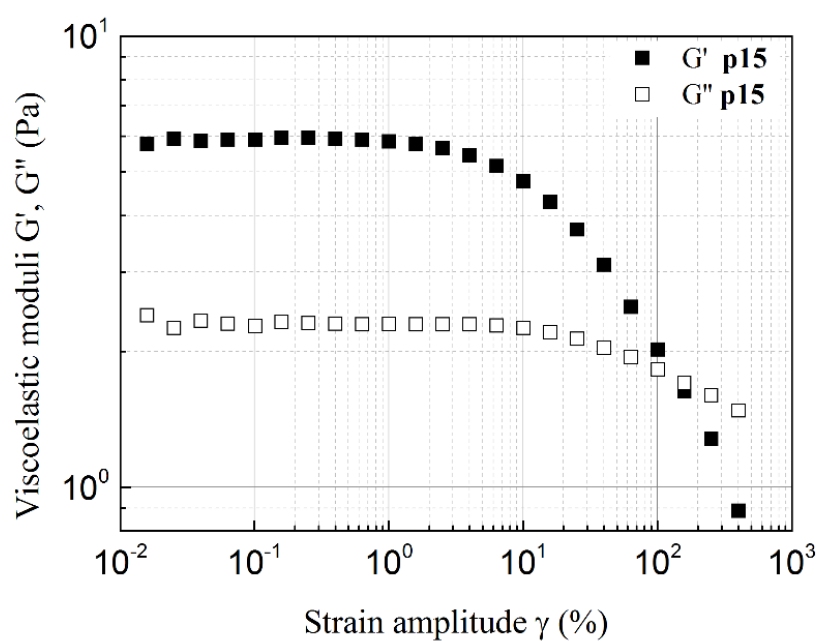

**Figure S2:** Determination of the linear viscoelastic domain: storage modulus  $G'$  and loss modulus  $G''$  as a function of strain amplitude (p15 sputum).
